# Supplementary material for: Bioactivity Screening and Gene-Trait Matching across Marine Sponge-Associated Bacteria
Source: PubMed Central journal article supplement (PMC7912018; doi:10.3390/md19020075), 2021-01-30
Supplement: marinedrugs-19-00075-s001.pdf [file marinedrugs-19-00075-s001.pdf]

# Supplementary Material

## Bioactivity Screening and Gene-Trait Matching Across Marine Sponge-Associated Bacteria

Asimena Gavriilidou <sup>1,\*</sup>, Thomas Andrew Mackenzie <sup>2</sup>, Pilar Sánchez <sup>2</sup>, José R. Tormo <sup>2</sup>, Colin Ingham <sup>3</sup>, Hauke Smidt <sup>1</sup> and Detmer Sipkema <sup>1</sup>

<sup>1</sup> Laboratory of Microbiology, Wageningen University and Research, 6708 WE Wageningen, The Netherlands

<sup>2</sup> Fundación MEDINA, Centro de Excelencia en Investigación de Medicamentos Innovadores en Andalucía, Avda. del Conocimiento 34, 18016 Granada, Spain

<sup>3</sup> Hoekmine BV, Utrecht, The Netherlands

\* Correspondence: [asimena.gavriilidou@wur.nl](mailto:asimena.gavriilidou@wur.nl)

## Table of Contents

|                  |    |
|------------------|----|
| Figure S1 .....  | 3  |
| Table S1 .....   | 4  |
| Table S2 .....   | 5  |
| Table S3 .....   | 8  |
| Table S4 .....   | 9  |
| Table S5 .....   | 11 |
| References ..... | 12 |

**Figure S1.** KnownClusterBlast output of biosynthetic gene clusters (BGCs) predicted in strain Aa3\_DN216\_4B10\_1 showing 100% homology to reference BGCs in the Minimum Information about a Biosynthetic Gene cluster (MIBiG) database [1]. Colors indicate BLAST matches of individual genes between query and reference sequences.

a) BGC 3: Bacteriocin

Query sequence

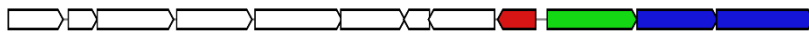

BGC0001534: branched-chain fatty acids (100% of genes show similarity), Other

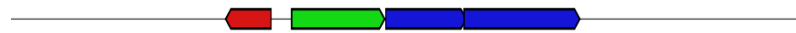

b) BGC 4: NRPS-like

Query sequence

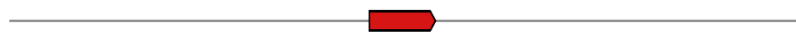

BGC0001758: rhizomide A / rhizomide B / rhizomide C (100% of genes show similarity), NRP

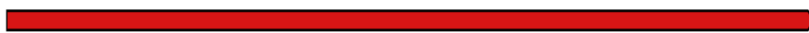

c) BGC 16: NRPS

Query sequence

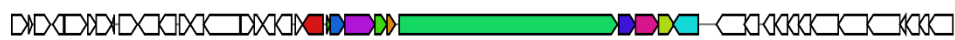

BGC0000371: heterobactin A / heterobactin S2 (100% of genes show similarity), NRP

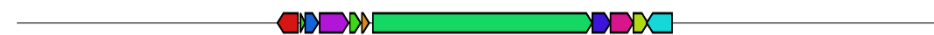

**Table S1.** Genome assembly metrics of strains included in the present study.

| Strain ID        | Isolation Source             | Contigs | Genome size (Mb) | GC content (%) | N50 (Mb) | Completeness (%) | Contamination (%) | Coverage (X) | Total gene count |
|------------------|------------------------------|---------|------------------|----------------|----------|------------------|-------------------|--------------|------------------|
| Aa3_DN55_6A7     | <i>Aplysina aerophoba</i>    | 36      | 7.2              | 64.6           | 0.4      | 100.0            | 0.1               | 31           | 6655             |
| Pf1_Ps_8H04_1    | <i>Petrosia ficiformis</i>   | 18      | 5.7              | 48.2           | 0.5      | 100.0            | 0.2               | 295*         | 5174             |
| Pf1_DN206_4B7    | <i>Petrosia ficiformis</i>   | 52      | 5.1              | 52.8           | 0.4      | 100              | 0.8               | 226*         | 4692             |
| Irc_Ps_AB108     | <i>Ircinia</i> sp.           | 49      | 5.9              | 44.6           | 0.4      | 99.6             | 0.0               | 200*         | 5369             |
| Pf1_DN64_8G1     | <i>Petrosia ficiformis</i>   | 30      | 5.8              | 51.4           | 0.6      | 99.9             | 0.3               | 206          | 5275             |
| Aa3_DN64_1D3     | <i>Aplysina aerophoba</i>    | 22      | 5.8              | 50.3           | 0.5      | 99.6             | 0.3               | 711*         | 5239             |
| Pf1_Ps_8H06      | <i>Petrosia ficiformis</i>   | 40      | 6.1              | 49.7           | 0.4      | 99.6             | 0.6               | 264*         | 5554             |
| Cn_Ps_AB111      | <i>Chondrilla nucula</i>     | 36      | 5.9              | 49.8           | 0.4      | 99.9             | 0.0               | 228*         | 5423             |
| Aa3_Str.68_7G12  | <i>Aplysina aerophoba</i>    | 29      | 5.9              | 51.0           | 0.5      | 99.7             | 0.3               | 138*         | 5288             |
| Acac_Ps_AB113    | <i>Acanthella acuta</i>      | 13      | 5.4              | 51.0           | 0.9      | 99.6             | 0.0               | 191*         | 4886             |
| Aa3_DN166_3E9_2  | <i>Aplysina aerophoba</i>    | 40      | 4.6              | 56.2           | 0.2      | 99.1             | 0.0               | 237          | 4558             |
| Pf1_DN81_6F7_2   | <i>Petrosia ficiformis</i>   | 30      | 4.5              | 57.9           | 0.3      | 99.9             | 0.0               | 165          | 4356             |
| Cc1_DN217_4H2    | <i>Corticium candelabrum</i> | 108     | 4.7              | 49.8           | 0.1      | 99.6             | 1.1               | 317          | 4229             |
| Aa3_DN138_5C8    | <i>Aplysina aerophoba</i>    | 46      | 3.3              | 41.4           | 0.2      | 100.0            | 0.0               | 310          | 3085             |
| Pf1_DN14_7A9_1   | <i>Petrosia ficiformis</i>   | 51      | 2.9              | 46.8           | 0.1      | 97.7             | 0.3               | 113          | 2434             |
| Aa3_DN73_5E10_2  | <i>Aplysina aerophoba</i>    | 41      | 2.6              | 47.0           | 0.1      | 92.2             | 0.3               | 385          | 2194             |
| Aa3_DN30_1H2     | <i>Aplysina aerophoba</i>    | 39      | 5.4              | 32.9           | 0.2      | 97.3             | 1.5               | 86           | 4684             |
| Aa3_DN216_4B10_1 | <i>Aplysina aerophoba</i>    | 79      | 7.1              | 62.5           | 0.3      | 99.9             | 1.1               | 43           | 6770             |
| Aa3_DN213_3F7    | <i>Aplysina aerophoba</i>    | 60      | 4.2              | 63.0           | 0.2      | 99.4             | 0.0               | 300          | 3850             |
| Aa3_DN216_4B10_2 | <i>Aplysina aerophoba</i>    | 19      | 3.4              | 72.9           | 0.3      | 99.8             | 0.0               | 51           | 3220             |
| Aa3_DN71_7G3_2   | <i>Aplysina aerophoba</i>    | 65      | 4.9              | 40.5           | 0.2      | 90.4             | 1.4               | 112          | 4807             |

\*adapted from Versluis et al. [1]

**Table S2.** Taxonomic classification of studied strains based on 16S rRNA gene sequences (nr/nt database) and marker genes (GTDB database).

| Strain ID     | 16S rRNA gene length (bp) | Best BLAST hit (accession number)                | ID%   | E-value | GTDB-Tk classification                                                                                                                   |
|---------------|---------------------------|--------------------------------------------------|-------|---------|------------------------------------------------------------------------------------------------------------------------------------------|
| Aa3_DN55_6A7  | 1340                      | <i>Bradyrhizobium</i> sp. LM6 (KX774628.1)       | 100.0 | 0.0     | d__Bacteria;p__Proteobacteria;c__Alphaproteobacteria;o__Rhizobiales;f__Xanthobacteraceae;g__Bradyrhizobium;s__Bradyrhizobium sp003020075 |
| Pf1_Ps_8H04_1 | 988                       | <i>Pseudovibrio</i> sp. MaPt6 (JX436420.1)       | 99.9  | 0.0     | d__Bacteria;p__Proteobacteria;c__Alphaproteobacteria;o__Rhizobiales;f__Stappiaceae;g__Pseudovibrio;s__                                   |
| Pf1_DN206_4B7 | 1337                      | <i>Pseudovibrio</i> sp. MA_AMC_33 (MN703974.1)   | 99.85 | 0.0     | d__Bacteria;p__Proteobacteria;c__Alphaproteobacteria;o__Rhizobiales;f__Stappiaceae;g__Pseudovibrio;s__                                   |
| Irc_Ps_AB108  | 1342                      | <i>Pseudovibrio</i> sp. 2011SOCNI15 (KF582860.1) | 100.0 | 0.0     | d__Bacteria;p__Proteobacteria;c__Alphaproteobacteria;o__Rhizobiales;f__Stappiaceae;g__Pseudovibrio;s__Pseudovibrio sp900143565           |
| Pf1_DN64_8G1  | 1335                      | <i>Pseudovibrio</i> sp. 2011SOCNI15 (KF582860.1) | 99.93 | 0.0     | d__Bacteria;p__Proteobacteria;c__Alphaproteobacteria;o__Rhizobiales;f__Stappiaceae;g__Pseudovibrio;s__Pseudovibrio sp900143565           |
| Aa3_DN64_1D3  | 1335                      | <i>Pseudovibrio</i> sp. 2011SOCNI15 (KF582860.1) | 99.93 | 0.0     | d__Bacteria;p__Proteobacteria;c__Alphaproteobacteria;o__Rhizobiales;f__Stappiaceae;g__Pseudovibrio;s__Pseudovibrio sp900143565           |

|                 |      |                                                                       |       |     |                                                                                                                                               |
|-----------------|------|-----------------------------------------------------------------------|-------|-----|-----------------------------------------------------------------------------------------------------------------------------------------------|
| Pf1_Ps_8H06     | 1325 | <i>Pseudovibrio</i> sp. 2011SOCNI42<br>(KF582882.1)                   | 100.0 | 0.0 | d__Bacteria;p__Proteobacteria;c__Alphaproteobacteria;o__Rhizobiales;f__Stappiaceae;g__Pseudovibrio;s__Pseudovibr<br>io sp900143565            |
| Cn_Ps_AB111     | 906  | <i>Pseudovibrio</i> sp. 2011SOCNI15<br>(KF582860.1)                   | 99.89 | 0.0 | d__Bacteria;p__Proteobacteria;c__Alphaproteobacteria;o__Rhizobiales;f__Stappiaceae;g__Pseudovibrio;s__Pseudovibr<br>io sp900143565            |
| Aa3_Str.68_7G12 | 1325 | <i>Pseudovibrio</i> sp. 2011SOCNI42<br>(KF582882.1)                   | 100.0 | 0.0 | d__Bacteria;p__Proteobacteria;c__Alphaproteobacteria;o__Rhizobiales;f__Stappiaceae;g__Pseudovibrio;s__Pseudovibr<br>io sp900143565            |
| Acac_Ps_AB113   | 1341 | <i>Pseudovibrio</i> sp. ESS-18<br>(MH057247.1)                        | 99.93 | 0.0 | d__Bacteria;p__Proteobacteria;c__Alphaproteobacteria;o__Rhizobiales;f__Stappiaceae;g__Pseudovibrio;s__Pseudovibr<br>io sp900143565            |
| Aa3_DN166_3E9_2 | 1316 | <i>Ruegeria</i> sp. 70077<br>(KX833139.1)                             | 99.93 | 0.0 | d__Bacteria;p__Proteobacteria;c__Alphaproteobacteria;o__Rhodobacterales;f__Rhodobacteraceae;g__Ruegeria;s__                                   |
| Pf1_DN81_6F7_2  | 991  | <i>Ruegeria atlantica</i> DN83_2B6<br>(KP769432.1)                    | 100.0 | 0.0 | d__Bacteria;p__Proteobacteria;c__Alphaproteobacteria;o__Rhodobacterales;f__Rhodobacteraceae;g__Ruegeria;s__                                   |
| Cc1_DN217_4H2   | 1377 | <i>Microbulbifer echini</i> ROA029<br>(MT510173.1)                    | 99.85 | 0.0 | d__Bacteria;p__Proteobacteria;c__Gammaproteobacteria;o__Pseudomonadales;f__Cellvibrionaceae;g__Microbulbifer;s__<br>—                         |
| Aa3_DN138_5C8   | 1396 | <i>Acinetobacter radioresistens</i><br>OsEp_Plm_15B15<br>(MT367790.1) | 100.0 | 0.0 | d__Bacteria;p__Proteobacteria;c__Gammaproteobacteria;o__Pseudomonadales;f__Moraxellaceae;g__Acinetobacter;s__<br>Acinetobacter radioresistens |

|                  |      |                                                            |       |     |                                                                                                                                           |
|------------------|------|------------------------------------------------------------|-------|-----|-------------------------------------------------------------------------------------------------------------------------------------------|
| Pf1_DN14_7A9_1   | 1373 | <i>Psychrobacter celer</i> 7A3<br>(KU525106.1)             | 100.0 | 0.0 | d__Bacteria;p__Proteobacteria;c__Gammaproteobacteria;o__Pseudomonadales;f__Moraxellaceae;g__Psychrobacter;s__Psychrobacter sp002810365    |
| Aa3_DN73_5E10_2  | 1385 | <i>Psychrobacter celer</i> G205M1<br>(MH256047.1)          | 100.0 | 0.0 | d__Bacteria;p__Proteobacteria;c__Gammaproteobacteria;o__Pseudomonadales;f__Moraxellaceae;g__Psychrobacter;s__Psychrobacter sp002810365    |
| Aa3_DN30_1H2     | 1044 | <i>Aquimarina macrocephali</i> XH119<br>(KC178950.1)       | 100.0 | 0.0 | d__Bacteria;p__Bacteroidota;c__Bacteroidia;o__Flavobacteriales;f__Flavobacteriaceae;g__Aquimarina;s__Aquimarina megaterium                |
| Aa3_DN216_4B10_1 | 1068 | <i>Rhodococcus erythropolis</i> KB1<br>(CP050124.1)        | 100.0 | 0.0 | d__Bacteria;p__Actinobacteriota;c__Actinobacteria;o__Mycobacteriales;f__Mycobacteriaceae;g__Rhodococcus;s__Rhodococcus erythropolis_D     |
| Aa3_DN213_3F7    | 1368 | <i>Brevibacterium aurantiacum</i><br>SMQ-1419 (CP025333.1) | 100.0 | 0.0 | d__Bacteria;p__Actinobacteriota;c__Actinobacteria;o__Actinomycetales;f__Brevibacteriaceae;g__Brevibacterium;s__Brevibacterium aurantiacum |
| Aa3_DN216_4B10_2 | 1360 | <i>Janibacter melonis</i> M0604<br>(KF924217.1)            | 99.93 | 0.0 | d__Bacteria;p__Actinobacteriota;c__Actinobacteria;o__Actinomycetales;f__Dermatophilaceae;g__Janibacter;s__Janibacter melonis              |
| Aa3_DN71_7G3_2   | 1397 | <i>Bacillus frigoritolerans</i> ZB201705<br>(CP030063.1)   | 100.0 | 0.0 | d__Bacteria;p__Firmicutes;c__Bacilli;o__Bacillales;f__Bacillaceae_A;g__Bacillus_X;s__Bacillus_X frigoritolerans                           |

**Table S3.** Relative abundance of biosynthetic gene cluster (BGC) types identified by antiSMASH [2]. Numbers were normalized according to the genome size. NRPS; non-ribosomal peptide synthetase.

| Strain ID        | BGC types   |      |         |             |             |        | Total BGCs |
|------------------|-------------|------|---------|-------------|-------------|--------|------------|
|                  | Bacteriocin | NRPS | Terpene | Betalactone | Siderophore | Others |            |
| Aa3_DN55_6A7     | 0.3         | 0.3  | 0.0     | 0.3         | 0.0         | 0.0    | 0.7        |
| Pf1_Ps_8H04_1    | 0.2         | 0.0  | 0.2     | 0.2         | 0.0         | 0.4    | 0.9        |
| Pf1_DN206_4B7    | 0.2         | 0.2  | 0.2     | 0.2         | 0.0         | 0.4    | 1.2        |
| Irc_Ps_AB108     | 0.3         | 0.2  | 0.2     | 0.2         | 0.2         | 0.5    | 1.5        |
| Pf1_DN64_8G1     | 0.3         | 0.2  | 0.2     | 0.3         | 0.2         | 0.7    | 1.9        |
| Aa3_DN64_1D3     | 0.3         | 0.2  | 0.2     | 0.3         | 0.2         | 0.5    | 1.7        |
| Pf1_Ps_8H06      | 0.2         | 0.2  | 0.2     | 0.2         | 0.0         | 0.7    | 1.3        |
| Cn_Ps_AB111      | 0.3         | 0.0  | 0.2     | 0.2         | 0.0         | 0.3    | 1.0        |
| Aa3_Str.68_7G12  | 0.2         | 0.2  | 0.2     | 0.2         | 0.2         | 0.7    | 1.5        |
| Acac_Ps_AB113    | 0.4         | 0.0  | 0.2     | 0.2         | 0.2         | 0.4    | 1.3        |
| Aa3_DN166_3E9_2  | 0.2         | 0.0  | 0.0     | 0.2         | 0.0         | 1.1    | 1.5        |
| Pf1_DN81_6F7_2   | 0.2         | 0.0  | 0.0     | 0.2         | 0.0         | 0.9    | 1.3        |
| Cc1_DN217_4H2    | 0.2         | 0.0  | 0.0     | 0.0         | 0.2         | 0.9    | 1.3        |
| Aa3_DN138_5C8    | 0.0         | 0.0  | 0.0     | 0.6         | 0.3         | 0.3    | 1.2        |
| Pf1_DN14_7A9_1   | 0.0         | 0.0  | 0.0     | 0.3         | 0.0         | 0.0    | 0.3        |
| Aa3_DN73_5E10_2  | 0.0         | 0.0  | 0.0     | 0.4         | 0.0         | 0.0    | 0.4        |
| Aa3_DN30_1H2     | 0.6         | 0.4  | 0.4     | 0.0         | 0.0         | 0.4    | 1.7        |
| Aa3_DN216_4B10_1 | 0.1         | 1.0  | 0.1     | 0.0         | 0.0         | 1.5    | 2.8        |
| Aa3_DN213_3F7    | 0.2         | 0.7  | 0.2     | 0.0         | 0.2         | 0.7    | 2.1        |
| Aa3_DN216_4B10_2 | 0.0         | 0.0  | 0.3     | 0.0         | 0.3         | 0.6    | 1.2        |
| Aa3_DN71_7G3_2   | 0.0         | 0.2  | 0.4     | 0.2         | 0.2         | 0.4    | 1.4        |



**Table S4.** Information on BGCs detected by antiSMASH [2] of strains selected for gene-trait matching and comparison to the Minimum Information about a Biosynthetic Gene cluster (MIBiG) database [3].

| Strain ID        | BGC | BGC type               | Most similar known (MIBiG)                                                           | Similarity | MIBiG accession [3] |
|------------------|-----|------------------------|--------------------------------------------------------------------------------------|------------|---------------------|
| Aa3_DN216_4B10_1 | 1   | NRPS, terpene          | SF2575                                                                               | 6%         | BGC0000269          |
|                  | 2   | NRPS                   | coelichelin                                                                          | 27%        | BGC0000325          |
|                  | 3   | bacteriocin            | branched-chain fatty acids                                                           | 100%       | BGC0001534          |
|                  | 4   | NRPS-like              | rhizomide A/rhizomide B/ rhizomide C                                                 | 100%       | BGC0001758          |
|                  | 5   | NRPS                   | bacillomycin D                                                                       | 20%        | BGC0001090          |
|                  | 6   | NRPS                   | -                                                                                    | -          | -                   |
|                  | 7   | NRPS                   | rifamorpholine A/rifamorpholine B/rifamorpholine C/rifamorpholine D/rifamorpholine E | 4%         | BGC0001759          |
|                  | 8   | ectoine                | ectoine                                                                              | 75%        | BGC0000853          |
|                  | 9   | NRPS                   | erythrochelin                                                                        | 57%        | BGC0000349          |
|                  | 10  | lanthipeptide          | -                                                                                    | -          | -                   |
|                  | 11  | PKS-like, amglyccycl   | acarbose                                                                             | 7%         | BGC0000691          |
|                  | 12  | butyrolactone          | -                                                                                    | -          | -                   |
|                  | 13  | NRPS-like              | -                                                                                    | -          | -                   |
|                  | 14  | NRPS                   | chloramphenicol                                                                      | 17%        | BGC0000893          |
|                  | 15  | NRPS-like              | thiotulin                                                                            | 8%         | BGC0001193          |
|                  | 16  | NRPS                   | heterobactin A/heterobactin S2                                                       | 100%       | BGC0000371          |
|                  | 17  | LAP                    | diisonitrile antibiotic SF2768                                                       | 11%        | BGC0001574          |
|                  | 18  | T1PKS                  | -                                                                                    | -          | -                   |
|                  | 19  | T1PKS                  | kirromycin                                                                           | 8%         | BGC0001070          |
|                  | 20  | terpene                | carotenoid                                                                           | 18%        | BGC0000633          |
| Pf1_DN64_8G1     | 1   | acyl_ amino_ acids     | -                                                                                    | -          | -                   |
|                  | 2   | NRPS                   | rimosamide                                                                           | 14%        | BGC0001760          |
|                  | 3   | betalactone            | pseudaminic acid                                                                     | 22%        | BGC0001747          |
|                  | 4   | T1PKS, T3PKS           | -                                                                                    | -          | -                   |
|                  | 5   | bacteriocin            | -                                                                                    | -          | -                   |
|                  | 6   | terpene                | -                                                                                    | -          | -                   |
|                  | 7   | betalactone            | fengycin                                                                             | 13%        | BGC0001095          |
|                  | 8   | arylpolyene, ladderane | -                                                                                    | -          | -                   |

|               |    |                        |                   |     |            |
|---------------|----|------------------------|-------------------|-----|------------|
|               | 9  | siderophore            | -                 | -   | -          |
|               | 10 | bacteriocin            | -                 | -   | -          |
|               | 1  | betalactone            | pseudaminic acid  | 22% | BGC0001747 |
|               | 2  | NRPS                   | rimosamide        | 14% | BGC0001760 |
|               | 3  | acyl_amino_acids       | -                 | -   | -          |
|               | 4  | arylpolyene, ladderane | -                 | -   | -          |
| Aa3_DN64_1D3  | 5  | terpene                | -                 | -   | -          |
|               | 6  | bacteriocin            | -                 | -   | -          |
|               | 7  | siderophore            | -                 | -   | -          |
|               | 8  | bacteriocin            | -                 | -   | -          |
|               | 9  | betalactone            | fengycin          | 13% | BGC0001095 |
|               | 10 | T3PKS, T1PKS           | -                 | -   | -          |
|               | 1  | NRPS                   | coelibactin       | 27% | BGC0000324 |
|               | 2  | NRPS                   | streptobactin     | 11% | BGC0000368 |
|               | 3  | NRPS-like              | -                 | -   | -          |
|               | 4  | siderophore            | desferrioxamine E | 50% | BGC0001478 |
| Aa3_DN213_3F7 | 5  | terpene                | carotenoid        | 85% | BGC0000636 |
|               | 6  | LAP                    | corynazolicin     | 42% | BGC0001174 |
|               | 7  | ectoine                | ectoine           | 75% | BGC0000853 |
|               | 8  | NRPS                   | caboxamycin       | 20% | BGC0001444 |
|               | 9  | bacteriocin            | -                 | -   | -          |

**Table S5.** Growth media and isolation source of the studied bacterial strains. Details on the media preparation can be found in the References mentioned below. MA; Marine Agar, MA/10; Marine Agar (10x diluted), MHA; Mueller-Hinton Agar, MHA/10; Mueller-Hinton Agar (10x diluted).

| Strain ID        | Isolation source             | Medium | Reference |
|------------------|------------------------------|--------|-----------|
| Aa3_DN55_6A7     | <i>Aplysina aerophoba</i>    | MA/10  | [4]       |
| Pf1_Ps_8H04_1    | <i>Petrosia ficiformis</i>   | MA     | [1]       |
| Pf1_DN206_4B7    | <i>Petrosia ficiformis</i>   | MA     | [4]       |
| Irc_Ps_AB108     | <i>Ircinia</i> sp.           | MA     | [1]       |
| Pf1_DN64_8G1     | <i>Petrosia ficiformis</i>   | MA     | [4]       |
| Aa3_DN64_1D3     | <i>Aplysina aerophoba</i>    | MA     | [4]       |
| Pf1_Ps_8H06      | <i>Petrosia ficiformis</i>   | MA     | [1]       |
| Cn_Ps_AB111      | <i>Chondrilla nucula</i>     | MA     | [1]       |
| Aa3_Str.68_7G12  | <i>Aplysina aerophoba</i>    | MA     | [1]       |
| Acac_Ps_AB113    | <i>Acanthella acuta</i>      | MA     | [1]       |
| Aa3_DN166_3E9_2  | <i>Aplysina aerophoba</i>    | MA     | [4]       |
| Pf1_DN81_6F7_2   | <i>Petrosia ficiformis</i>   | MHA    | [4]       |
| Cc1_DN217_4H2    | <i>Corticium candelabrum</i> | MA     | [4]       |
| Aa3_DN138_5C8    | <i>Aplysina aerophoba</i>    | MA     | [4]       |
| Pf1_DN14_7A9_1   | <i>Petrosia ficiformis</i>   | MHA/10 | [4]       |
| Aa3_DN73_5E10_2  | <i>Aplysina aerophoba</i>    | MHA    | [4]       |
| Aa3_DN30_1H2     | <i>Aplysina aerophoba</i>    | MHA    | [4]       |
| Aa3_DN216_4B10_1 | <i>Aplysina aerophoba</i>    | MHA    | [4]       |
| Aa3_DN213_3F7    | <i>Aplysina aerophoba</i>    | MA     | [4]       |
| Aa3_DN216_4B10_2 | <i>Aplysina aerophoba</i>    | MHA    | [4]       |
| Aa3_DN71_7G3_2   | <i>Aplysina aerophoba</i>    | MHA    | [4]       |

## References

1. Versluis, D.; Nijssse, B.; Naim, M.A.; Koehorst, J.J.; Wiese, J.; Imhoff, J.F.; Schaap, P.J.; van Passel, M.W.J.; Smidt, H.; Sipkema, D. Comparative genomics highlights symbiotic capacities and high metabolic flexibility of the marine genus *Pseudovibrio*. *Genome Biol Evol* **2018**, *10*, 125-142.
2. Blin, K.; Shaw, S.; Steinke, K.; Villebro, R.; Ziemert, N.; Lee, S.Y.; Medema, M.H.; Weber, T. AntiSMASH 5.0: Updates to the secondary metabolite genome mining pipeline. *Nucleic Acids Res* **2019**, *47*, W81-W87.
3. Medema, M.H.; Kottmann, R.; Yilmaz, P.; Cummings, M.; Biggins, J.B.; Blin, K.; de Bruijn, I.; Chooi, Y.H.; Claesen, J.; Coates, R.C., *et al.* Minimum information about a biosynthetic gene cluster. *Nat Chem Biol* **2015**, *11*, 625-631.
4. Versluis, D.; McPherson, K.; van Passel, M.W.J.; Smidt, H.; Sipkema, D. Recovery of previously uncultured bacterial genera from three mediterranean sponges. *Mar Biotechnol* **2017**, *19*, 454-468.
